# Supplementary material for: Meaningful Change Thresholds for the Psoriasis Symptoms and Signs Diary: A Secondary Analysis of a Randomized Clinical Trial
Source: PubMed Central journal article supplement — JAMA Dermatol. 2023 Dec 20;160(2):204–9. doi: 10.1001/jamadermatol.2023.5058 (PMC10733845; doi:10.1001/jamadermatol.2023.5058), 2023-12-20
Supplement: jamadermatol-e235058-s002.pdf [file jamadermatol-e235058-s002.pdf]

## Supplementary Online Content

Papp KA, Gordon K, Strober B, et al. Meaningful change thresholds for the Psoriasis Symptoms and Signs Diary: a secondary analysis of a randomized clinical trial. *JAMA Dermatol*. Published online December 20, 2023.

doi:10.1001/jamadermatol.2023.5058

**eFigure 1.** Patient Disposition Throughout the POETYK PSO-1 Trial

**eFigure 2.** Cumulative Distribution Function for PSSD Symptom Score Change From Baseline to Week 16 With All Treatment Arms Combined, Anchored to (A) the Patient Global Impression of Change and (B) the Patient Global Impression of Severity

**eFigure 3.** Cumulative Distribution Function for PSSD Sign Score Change From Baseline to Week 16 With All Treatment Arms Combined, Anchored to (A) the Patient Global Impression of Change and (B) the Patient Global Impression of Severity

**eFigure 4.** Cumulative Proportion of Patients Reporting Any Change From Baseline in PSSD Symptom Score at Week 16 of POETYK PSO-1, by Treatment Arm

**eFigure 5.** Cumulative Proportion of Patients Reporting Any Change From Baseline in PSSD Sign Score at Week 16 of POETYK PSO-1, by Treatment Arm

**eTable 1.** Polyserial Correlation Coefficients Between Anchor Variables and Change From Baseline at Week 16 in PSSD Domain and Total Scores

**eTable 2.** Distribution-Based Meaningful Within-Patient Change Threshold Estimates at Baseline for PSSD Domain and Total Scores

**eTable 3.** PGI-C–Anchored Mean Individual PSSD Item Score Change From Baseline at Week 16 in POETYK PSO-1

**eTable 4.** PGI-S–Anchored Mean Individual PSSD Item Score Change From Baseline at Week 16 in POETYK PSO-1

**eTable 5.** Distribution-Based Meaningful Within-Patient Change Threshold Estimates at Baseline for PSSD Individual Items

This supplementary material has been provided by the authors to give readers additional information about their work.

**eFigure 1.** Patient Disposition Throughout the POETYK PSO-1 Trial

Reprinted with permission from Armstrong AW, et al. *J Am Acad Dermatol.* 2023;88(1):29-39.  
<https://creativecommons.org/licenses/by-nc-nd/4.0/legalcode>

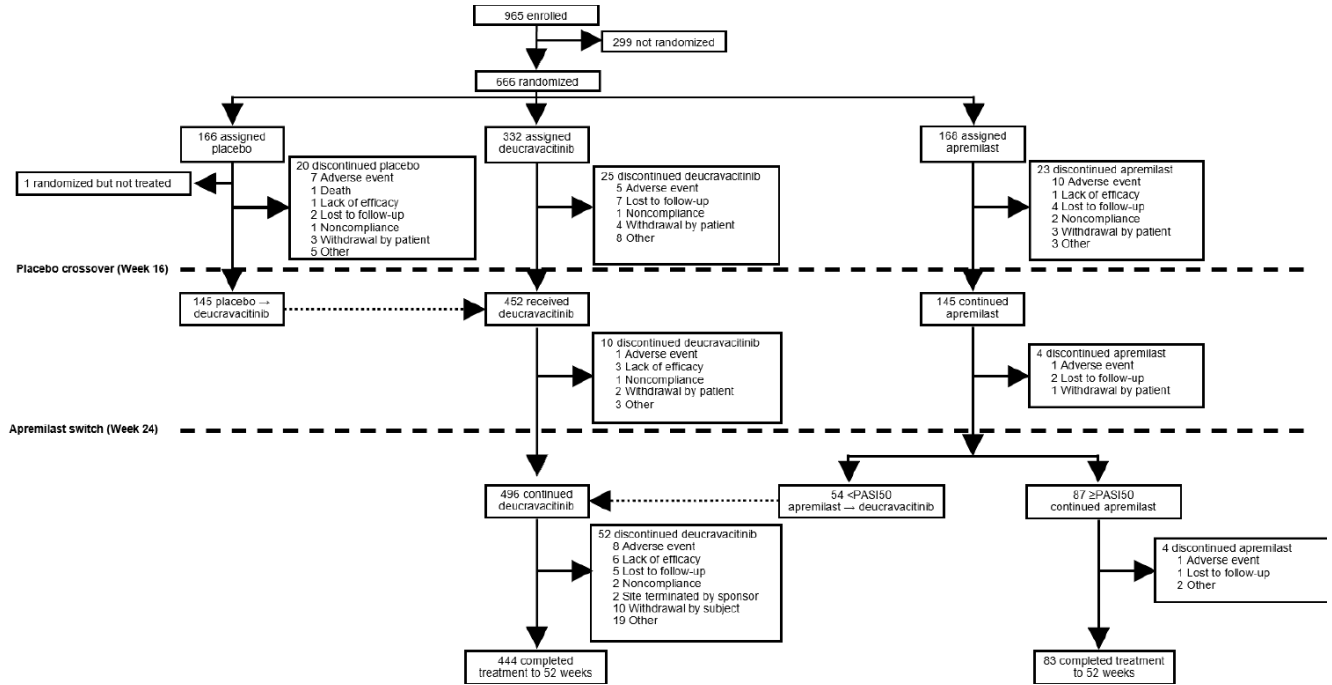

**Figure 2.** Cumulative Distribution Function for PSSD Symptom Score Change From Baseline to Week 16 With All Treatment Arms Combined, Anchored to (A) the Patient Global Impression of Change and (B) the Patient Global Impression of Severity

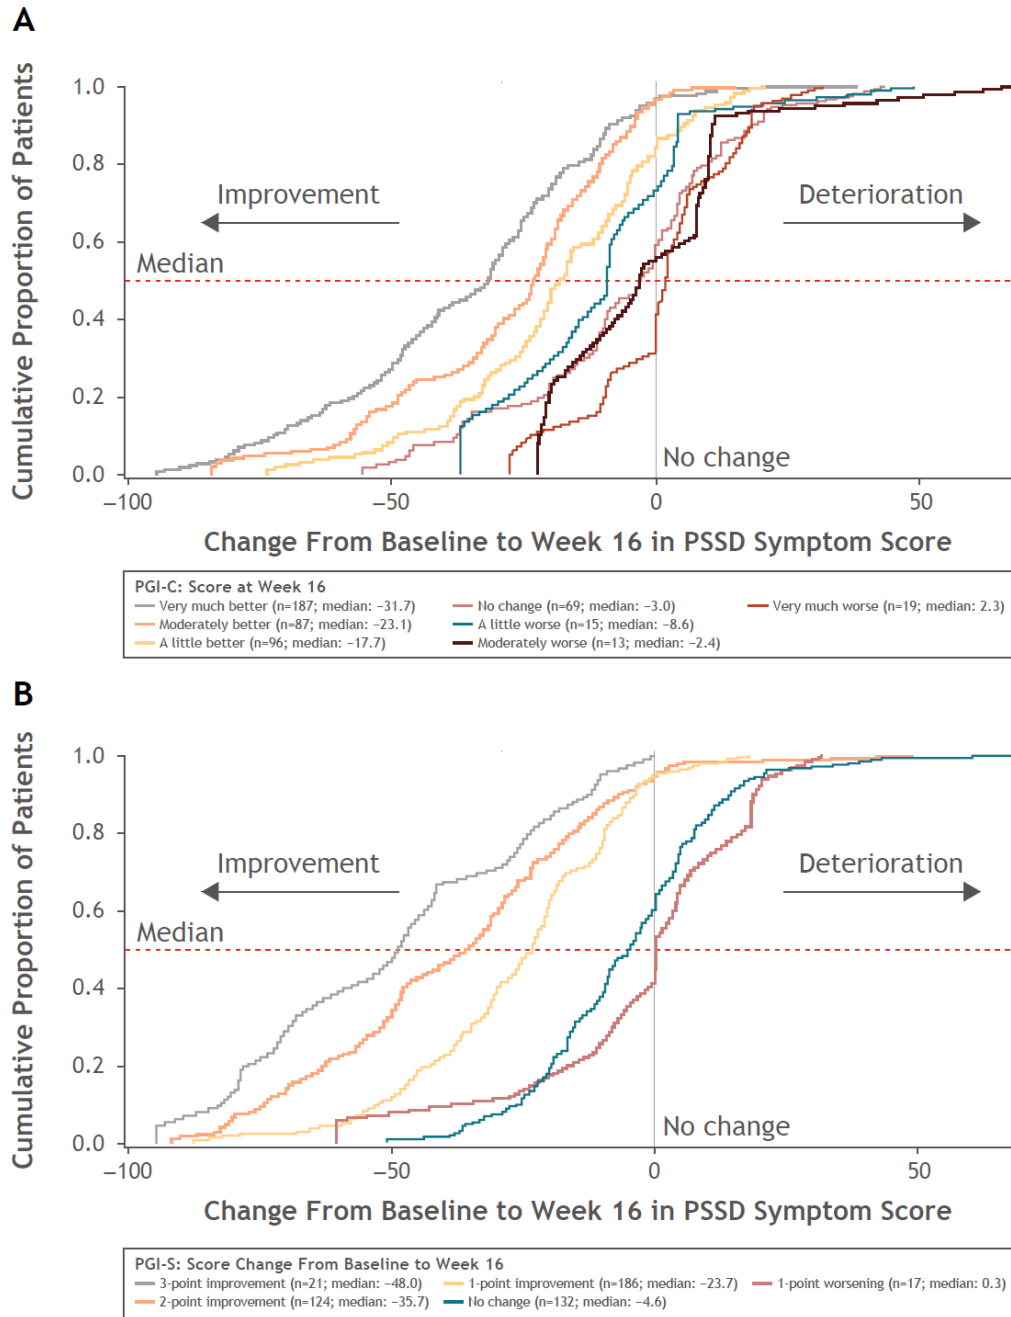

PGI-C, Patient Global Impression of Change; PGI-S, Patient Global Impression of Severity; PSSD, Psoriasis Symptoms and Signs Diary.

**Figure 3.** Cumulative Distribution Function for PSSD Sign Score Change From Baseline to Week 16 With All Treatment Arms Combined, Anchored to (A) the Patient Global Impression of Change and (B) the Patient Global Impression of Severity

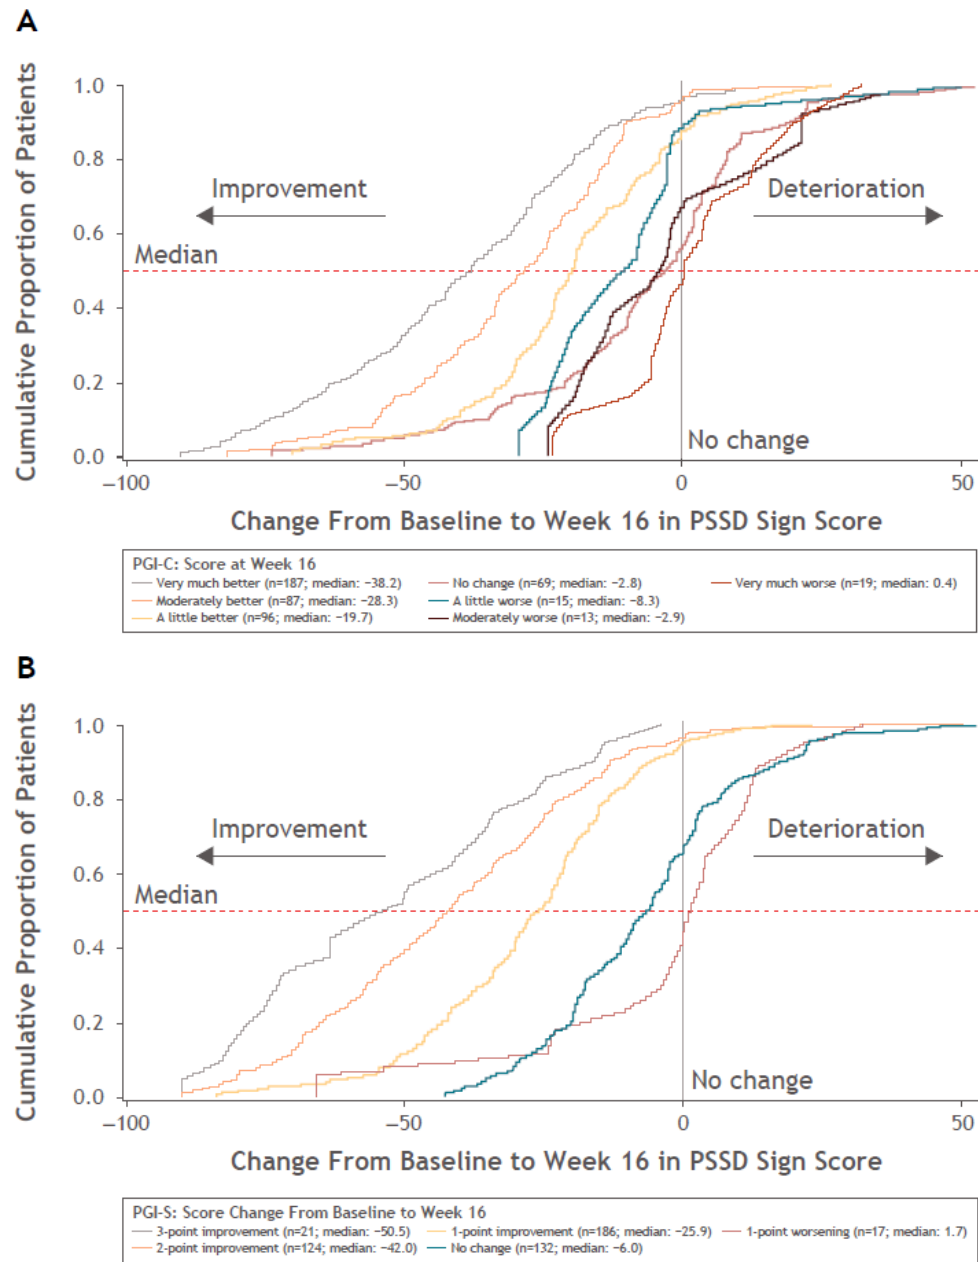

PGI-C, Patient Global Impression of Change; PGI-S, Patient Global Impression of Severity; PSSD, Psoriasis Symptoms and Signs Diary.

**Figure 4.** Cumulative Proportion of Patients Reporting Any Change From Baseline in PSSD Symptom Score at Week 16 of POETYK PSO-1, by Treatment Arm

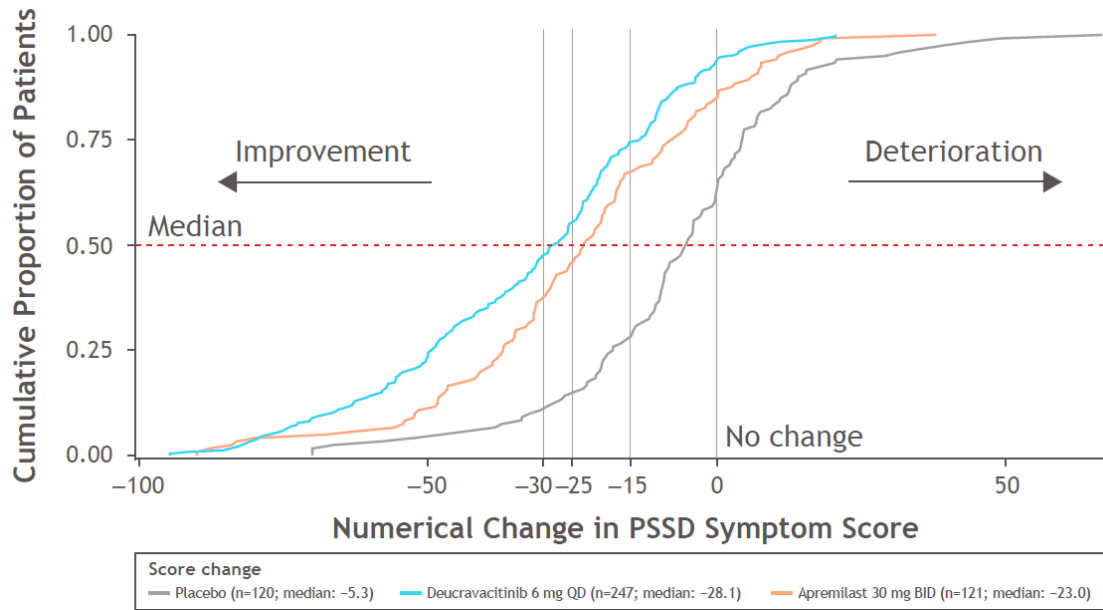

BID, twice daily; PSSD, Psoriasis Symptoms and Signs Diary; QD, once daily.

**Figure 5.** Cumulative Proportion of Patients Reporting Any Change From Baseline in PSSD Sign Score at Week 16 of POETYK PSO-1, by Treatment Arm

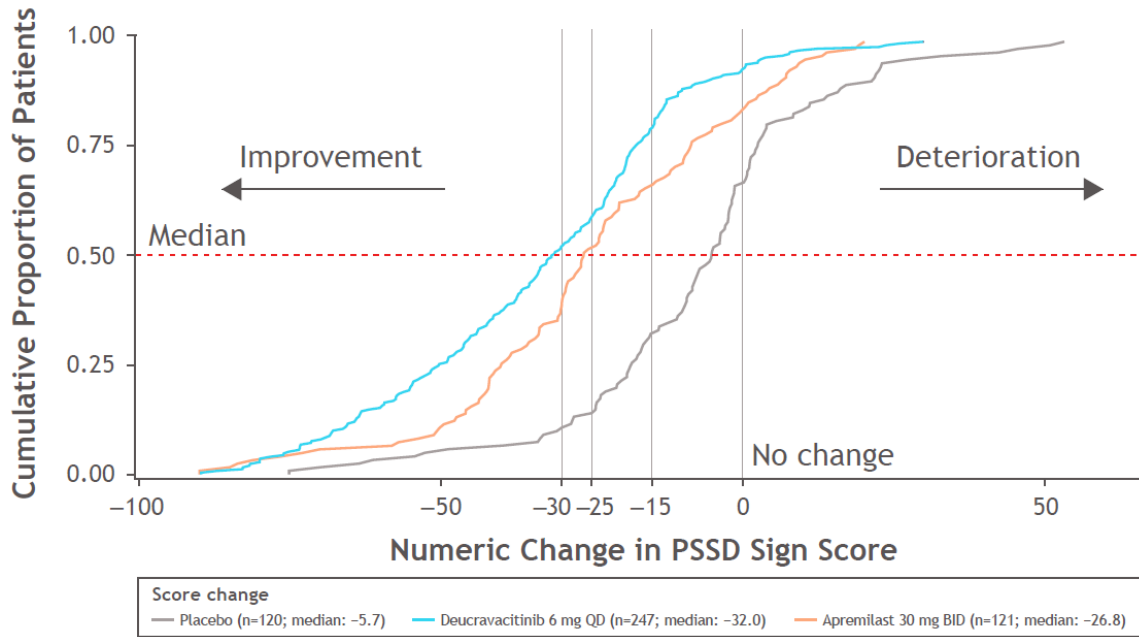

BID, twice daily; PSSD, Psoriasis Symptoms and Signs Diary; QD, once daily.

**eTable 1.** Polyserial Correlation Coefficients Between Anchor Variables and Change From Baseline at Week 16 in PSSD Domain and Total Scores

| <b>Anchor</b> | <b>Patients, no.</b> | <b>PSSD symptom score</b> | <b>PSSD sign score</b> | <b>PSSD total score</b> |
|---------------|----------------------|---------------------------|------------------------|-------------------------|
| PGI-C         | 486                  | 0.541                     | 0.606                  | 0.585                   |
| PGI-S         | 481                  | 0.562                     | 0.606                  | 0.596                   |

PGI-C, Patient Global Impression of Change; PGI-S, Patient Global Impression of Severity; PSSD, Psoriasis Symptoms and Signs Diary.

**eTable 2.** Distribution-Based Meaningful Within-Patient Change Threshold Estimates at Baseline for PSSD Domain and Total Scores

| <b>PSSD Domain</b> | <b>Patients, no.</b> | <b>0.5 SD</b> | <b>Cronbach's Alpha</b> | <b>SEM<sup>a</sup></b> |
|--------------------|----------------------|---------------|-------------------------|------------------------|
| Symptom score      | 601                  | 12.796        | 0.948                   | 5.808                  |
| Sign score         | 601                  | 11.090        | 0.945                   | 5.210                  |
| Total score        | 601                  | 11.648        | 0.969                   | 4.100                  |

<sup>a</sup>SEM was calculated as the SD multiplied by the square root of 1 minus the reliability as measured by Cronbach's alpha.

PSSD, Psoriasis Symptoms and Signs Diary; SD, standard deviation; SEM, standard error of measurement.



**eTable 3.** PGI-C–Anchored Mean Individual PSSD Item Score Change From Baseline at Week 16 in POETYK PSO-1

| PSSD Item            |               | PGI-C change group (No.)       |                                     |                                   |                |                     |                       |                      |
|----------------------|---------------|--------------------------------|-------------------------------------|-----------------------------------|----------------|---------------------|-----------------------|----------------------|
|                      |               | Much better (187) <sup>a</sup> | Moderately better (88) <sup>a</sup> | A little better (96) <sup>a</sup> | No change (69) | A little worse (15) | Moderately worse (14) | Very much worse (19) |
| Itch                 | Mean CFB (SD) | -4.3 (2.50)                    | -3.0 (2.27)                         | -1.9 (2.11)                       | -0.7 (2.40)    | -0.7 (1.71)         | -0.2 (2.66)           | 0.6 (1.24)           |
|                      | 95% CI        | -4.6 to -3.9                   | -3.4 to -2.5                        | -2.4 to -1.5                      | -1.2 to -0.1   | -1.7-0.2            | -1.7-1.4              | 0.0-1.2              |
|                      | SES           | -1.70                          | -1.30                               | -0.91                             | -0.27          | -0.41               | -0.07                 | 0.49                 |
| Pain                 | Mean CFB (SD) | -3.4 (2.72)                    | -2.6 (2.55)                         | -1.8 (2.29)                       | -0.7 (2.06)    | -0.5 (2.18)         | -0.2 (2.80)           | -0.4 (2.09)          |
|                      | 95% CI        | -3.8 to -3.0                   | -3.1 to -2.0                        | -2.3 to -1.3                      | -1.2 to -0.2   | -1.7-0.7            | -1.8-1.5              | -1.4-0.6             |
|                      | SES           | -1.24                          | -1.00                               | -0.78                             | -0.32          | -0.24               | -0.06                 | -0.17                |
| Stinging             | Mean CFB (SD) | -3.1 (2.82)                    | -2.5 (2.43)                         | -1.8 (2.27)                       | -0.3 (2.48)    | -1.0 (3.00)         | -0.3 (2.54)           | 0.5 (1.72)           |
|                      | 95% CI        | -3.5 to -2.7                   | -3.1 to -2.0                        | -2.3 to -1.3                      | -0.9-0.3       | -2.6-0.7            | -1.7-1.2              | -0.4-1.3             |
|                      | SES           | -1.11                          | -1.05                               | -0.79                             | -0.11          | -0.32               | -0.10                 | 0.27                 |
| Burning              | Mean CFB (SD) | -3.4 (2.78)                    | -2.8 (2.53)                         | -1.9 (2.37)                       | -0.6 (2.9)     | -1.1 (2.32)         | 0.0 (2.34)            | 0.29 (2.00)          |
|                      | 95% CI        | -3.8 to -3.0                   | -3.3 to -2.2                        | -2.3 to -1.4                      | -1.2 to -0.1   | -2.3-0.2            | -1.4-1.3              | -0.7-1.3             |
|                      | SES           | -1.24                          | -1.09                               | -0.79                             | -0.28          | -0.45               | -0.02                 | 0.15                 |
| Tightness            | Mean CFB (SD) | -4.0 (2.59)                    | -3.1 (2.20)                         | -2.0 (2.06)                       | -0.6 (2.45)    | -1.0 (2.07)         | 0.2 (2.55)            | 0.1 (1.72)           |
|                      | 95% CI        | -4.4 to -3.6                   | -3.6 to -2.7                        | -2.4 to -1.6                      | -1.2 to -0.1   | -2.2-0.1            | -1.3 to 1.7           | -0.8-0.9             |
|                      | SES           | -1.54                          | -1.42                               | -0.97                             | -0.26          | -0.50               | 0.08                  | 0.03                 |
| Dryness              | Mean CFB (SD) | -4.5 (2.45)                    | -3.3 (2.06)                         | -2.1 (2.05)                       | -0.7 (2.42)    | -1.0 (1.83)         | 0.2 (2.65)            | 0.1 (1.38)           |
|                      | 95% CI        | -4.8 to -4.1                   | -3.7 to -2.8                        | -2.5 to -1.7                      | -1.3 to -0.1   | -2.0-0.0            | -1.4-1.7              | -0.6-0.8             |
|                      | SES           | -1.83                          | -1.58                               | -1.02                             | -0.29          | -0.56               | 0.07                  | 0.08                 |
| Cracking             | Mean CFB (SD) | -4.0 (2.71)                    | -3.2 (2.23)                         | -2.1 (2.31)                       | -0.7 (2.59)    | -1.1 (2.31)         | 0.1 (2.91)            | 0.4 (2.47)           |
|                      | 95% CI        | -4.4 to -3.6                   | -3.6 to -2.7                        | -2.6 to -1.7                      | -1.4 to -0.1   | -2.4-0.2            | -1.6-1.8              | -0.8-1.6             |
|                      | SES           | -1.46                          | -1.41                               | -0.92                             | -0.28          | -0.47               | 0.02                  | 0.18                 |
| Scaling              | Mean CFB (SD) | -4.3 (2.53)                    | -3.2 (2.19)                         | -2.0 (1.98)                       | -0.6 (2.57)    | -0.7 (1.9)          | -0.4 (2.17)           | 0.4 (1.50)           |
|                      | 95% CI        | -4.7 to -3.9                   | -3.7 to -2.7                        | -2.4 to -1.6                      | -1.2 to 0.1    | -1.7-0.4            | -1.7-0.8              | -0.3-1.2             |
|                      | SES           | -1.69                          | -1.46                               | -1.00                             | -0.22          | -0.35               | -0.20                 | 0.29                 |
| Shedding/<br>flaking | Mean CFB (SD) | -4.6 (2.65)                    | -3.1 (2.32)                         | -2.0 (2.01)                       | -0.6 (2.48)    | -0.5 (2.04)         | -0.3 (2.18)           | 0.5 (1.67)           |
|                      | 95% CI        | -4.9 to -4.2                   | -3.6 to -2.6                        | -2.4 to -1.6                      | -1.2-0.0       | -1.7-0.6            | -1.6-0.9              | -0.3-1.3             |
|                      | SES           | -1.72                          | -1.34                               | -0.99                             | -0.25          | -0.26               | -0.15                 | 0.30                 |
| Redness              | Mean CFB (SD) | -4.1 (2.64)                    | -3.1 (1.95)                         | -1.9 (2.10)                       | -0.6 (2.53)    | -1.0 (1.97)         | -0.8 (2.17)           | 0.25 (1.62)          |
|                      | 95% CI        | -4.5 to -3.7                   | -3.5 to -2.7                        | -2.3 to -1.4                      | -1.2-0.0       | -2.1-0.1            | -2.0-0.5              | -0.5-1.0             |
|                      | SES           | -1.56                          | -1.59                               | -0.89                             | -0.22          | -0.50               | -0.36                 | 0.15                 |
| Bleeding             | Mean CFB (SD) | -2.6 (2.70)                    | -2.0 (2.31)                         | -1.4 (1.95)                       | -0.5 (2.12)    | -0.7 (2.68)         | -0.7 (2.63)           | 0.0 (1.95)           |
|                      | 95% CI        | -2.9 to -2.2                   | -2.5 to -1.5                        | -1.8 to -1.0                      | -1.0-0.0       | -2.2-0.8            | -2.2-0.8              | -0.9-1.0             |
|                      | SES           | -0.94                          | -0.88                               | -0.74                             | -0.24          | -0.25               | -0.27                 | 0.01                 |

<sup>a</sup>  $P \leq 0.0001$  from a paired (within samples)  $t$  test.

CFB, change from baseline; PGI-C, Patient Global Impression of Change; PSSD, Psoriasis Symptoms and Signs Diary; SD, standard deviation; SES, standardized effect size.

**eTable 4.** PGI-S–Anchored Mean Individual PSSD Item Score Change From Baseline at Week 16 in POETYK PSO-1

| PSSD Item |               | PGI-S change group (No.)              |                                        |                                        |                 |                        |                       |                       |
|-----------|---------------|---------------------------------------|----------------------------------------|----------------------------------------|-----------------|------------------------|-----------------------|-----------------------|
|           |               | 3-point improvement (21) <sup>a</sup> | 2-point improvement (124) <sup>a</sup> | 1-point improvement (187) <sup>a</sup> | No change (133) | 1-point worsening (17) | 2-point worsening (0) | 3-point worsening (1) |
| Itch      | Mean CFB (SD) | −6.0 (2.42)                           | −4.3 (2.60)                            | −2.8 (2.17)                            | −0.6 (1.95)     | −0.1 (1.97)            | –                     | 1.0 (–)               |
|           | 95% CI        | −7.1 to −4.9                          | −4.8 to −3.9                           | −3.1 to −2.5                           | −0.9 to −0.2    | −1.1–0.9               | –                     | –                     |
|           | SES           | −2.48                                 | −1.67                                  | −1.30                                  | −0.29           | −0.04                  | –                     | –                     |
| Pain      | Mean CFB (SD) | −4.8 (3.06)                           | −3.5 (3.01)                            | −2.5 (2.26)                            | −0.7 (1.87)     | 0.0 (2.41)             | –                     | 1.5 (–)               |
|           | 95% CI        | −6.2 to −3.4                          | −4.0 to −3.0                           | −2.8 to −2.1                           | −1.0 to −0.4    | −1.3–1.2               | –                     | –                     |
|           | SES           | −1.56                                 | −1.16                                  | −1.08                                  | −0.36           | −0.01                  | –                     | –                     |
| Stinging  | Mean CFB (SD) | −3.6 (3.55)                           | −3.4 (3.01)                            | −2.5 (2.29)                            | −0.3 (2.10)     | −0.1 (2.23)            | –                     | 1.3 (–)               |
|           | 95% CI        | −5.2 to −2.0                          | −3.9 to −2.9                           | −2.8 to −2.2                           | −0.7–0.1        | −1.2–1.1               | –                     | –                     |
|           | SES           | −1.01                                 | −1.13                                  | −1.09                                  | −0.14           | −0.04                  | –                     | –                     |
| Burning   | Mean CFB (SD) | −4.6 (3.14)                           | −3.6 (2.90)                            | −2.6 (2.35)                            | −0.5 (2.09)     | −0.4 (2.33)            | –                     | 0.5 (–)               |
|           | 95% CI        | −6.1 to −3.2                          | −4.2 to −3.1                           | −2.9 to −2.3                           | −0.9 to −0.1    | −1.6–0.8               | –                     | –                     |
|           | SES           | −1.47                                 | −1.26                                  | −1.11                                  | −0.23           | −0.18                  | –                     | –                     |
| Tightness | Mean CFB (SD) | −5.1 (2.80)                           | −4.2 (2.75)                            | −2.8 (2.07)                            | −0.7 (2.02)     | 0.1 (2.16)             | –                     | 1.0 (–)               |
|           | 95% CI        | −6.3 to −3.8                          | −4.7 to −3.7                           | −3.1 to −2.6                           | −1.0 to −0.3    | −1.0–1.2               | –                     | –                     |
|           | SES           | −1.81                                 | −1.54                                  | −1.37                                  | −0.33           | 0.04                   | –                     | –                     |
| Dryness   | Mean CFB (SD) | −5.9 (2.48)                           | −4.6 (2.52)                            | −3.1 (2.06)                            | −0.8 (2.06)     | 0.0 (2.20)             | –                     | 1.2 (–)               |
|           | 95% CI        | −7.0 to −4.8                          | −5.0 to −4.1                           | −3.4 to −2.8                           | −1.1 to −0.4    | −1.1–1.1               | –                     | –                     |
|           | SES           | −2.37                                 | −1.82                                  | −1.49                                  | −0.38           | 0.00                   | –                     | –                     |
| Cracking  | Mean CFB (SD) | −4.9 (2.79)                           | −4.3 (2.80)                            | −2.8 (2.23)                            | −0.8 (2.36)     | 0.0 (2.51)             | –                     | 1.5 (–)               |
|           | 95% CI        | −6.2 to −3.7                          | −4.8 to −3.8                           | −3.2 to −2.5                           | −1.2 to −0.4    | −1.3–1.3               | –                     | –                     |
|           | SES           | −1.77                                 | −1.52                                  | −1.28                                  | −0.32           | 0.01                   | –                     | –                     |
| Scaling   | Mean CFB (SD) | −5.5 (2.76)                           | −4.5 (2.67)                            | −3.0 (2.07)                            | −0.6 (2.03)     | 0.0 (2.20)             | –                     | 0.8 (–)               |
|           | 95% CI        | −6.7 to −4.2                          | −5.0 to −4.0                           | −3.3 to −2.7                           | −1.0 to −0.3    | −1.1–1.2               | –                     | –                     |
|           | SES           | −1.98                                 | −1.68                                  | −1.44                                  | −0.30           | 0.01                   | –                     | –                     |

|                  |               |              |              |              |              |             |   |           |
|------------------|---------------|--------------|--------------|--------------|--------------|-------------|---|-----------|
| Shedding/flaking | Mean CFB (SD) | -5.6 (3.10)  | -4.7 (2.79)  | -3.1 (2.16)  | -0.6 (2.00)  | 0.0 (2.12)  | - | 0.3 (-)   |
|                  | 95% CI        | -7.0 to -4.2 | -5.2 to -4.2 | -3.4 to -2.7 | -0.9 to -0.2 | -1.1-1.1    | - | -         |
|                  | SES           | -1.81        | -1.68        | -1.41        | -0.29        | 0.00        | - | -         |
| Redness          | Mean CFB (SD) | -5.5 (3.08)  | -4.2 (2.56)  | -2.9 (2.22)  | -0.7 (2.07)  | -0.3 (2.31) | - | - 0.7 (-) |
|                  | 95% CI        | -6.9 to -4.1 | -4.6 to -3.7 | -3.2 to -2.6 | -1.1 to -0.4 | -1.5-0.9    | - | -         |
|                  | SES           | -1.78        | -1.62        | -1.29        | -0.34        | -0.15       | - | -         |
| Bleeding         | Mean CFB (SD) | -3.3 (2.90)  | -2.8 (2.93)  | -1.8 (2.12)  | -0.5 (1.97)  | -0.6 (2.09) | - | 0.3 (-)   |
|                  | 95% CI        | -4.6 to -2.0 | -3.3 to -2.3 | -2.1 to -1.5 | -0.9 to -0.2 | -1.7-0.5    | - | -         |
|                  | SES           | -1.14        | -0.95        | -0.86        | -0.26        | -0.27       | - | -         |

<sup>a</sup> $P \leq 0.0002$  from a paired (within samples) *t* test.

CFB, change from baseline; PGI-S, Patient Global Impression of Severity; PSSD, Psoriasis Symptoms and Signs Diary; SD, standard deviation; SES, standardized effect size.

**eTable 5.** Distribution-Based Meaningful Within-Patient Change Threshold Estimates at Baseline for PSSD Individual Items

| <b>Item</b>      | <b>Patients, no.</b> | <b>0.5 SD</b> |
|------------------|----------------------|---------------|
| Itch             | 609                  | 1.197         |
| Pain             | 609                  | 1.499         |
| Stinging         | 609                  | 1.531         |
| Burning          | 609                  | 1.494         |
| Tightness        | 609                  | 1.275         |
| Dryness          | 609                  | 1.126         |
| Cracking         | 609                  | 1.343         |
| Scaling          | 609                  | 1.154         |
| Shedding/flaking | 609                  | 1.180         |
| Redness          | 609                  | 1.206         |
| Bleeding         | 609                  | 1.474         |

PSSD, Psoriasis Symptoms and Signs Diary; SD, standard deviation.
