# Supplementary material for: Meaningful Change Thresholds for the Psoriasis Symptoms and Signs Diary: A Secondary Analysis of a Randomized Clinical Trial
Source: PubMed Central journal article supplement — JAMA Dermatol. 2023 Dec 20;160(2):204–9. doi: 10.1001/jamadermatol.2023.5058 (PMC10733845; doi:10.1001/jamadermatol.2023.5058), 2023-12-20
Supplement: jamadermatol-e235058-s003.pdf [file jamadermatol-e235058-s003.pdf]

## Data Sharing Statement

Papp. Meaningful Change Thresholds for the Psoriasis Symptoms and Signs Diary. *JAMA Dermatol.* Published December 20, 2023. doi:10.1001/jamadermatol.2023.5058

### Data

**Data available:** No

### Additional Information

**Explanation for why data not available:** We are sharing the study protocol and the statistical analysis plan of the trial with this submission. The research we present concerns interpretive methodology rather than trial outcomes.
